# Supplementary material
Source: Royal Society of Chemistry journal article supplement (doi:10.1039/d6ay00445h)
Supplement: d6ay00445h1.pdf [file d6ay00445h1.pdf]

## **Development of a validated UPLC-MS<sup>3</sup> method for trace-level azoxystrobin determination in zebrafish liver tissues**

Yufeng Guo<sup>a,b#</sup>, Chunpeng Feng<sup>b#</sup>, Mengchuan Lai<sup>b</sup>, Meichen Liu<sup>b</sup>, Yalin Xi<sup>a\*\*\*</sup>, Lei Yin<sup>a,b\*\*</sup>, Meiyun Shi<sup>a,b\*</sup>.

<sup>a</sup> Central Hospital of Dalian University of Technology, Dalian University of Technology, Dalian, Liaoning 116023, PR China

<sup>b</sup> School of Chemical Engineering, Ocean and Life Sciences, Dalian University of Technology, Panjin, Liaoning, 124221, China.

\*Corresponding author, Meiyun Shi, [shimy@dlut.edu.cn](mailto:shimy@dlut.edu.cn)

\*\*Corresponding author, Lei Yin, [leiyin@dlut.edu.cn](mailto:leiyin@dlut.edu.cn)

\*\*\*Corresponding author, Yalin Xi, [yalinxi@163.com](mailto:yalinxi@163.com)

#Yufeng Guo and Chunpeng Feng contributed equally for this work.

Table S1. The accuracies and precisions of the UHPLC-MS<sup>3</sup> method for determination of azoxystrobin at different concentrations. (n=18)

| Azoxystrobin       | Low QC | Medium QC | High QC |
|--------------------|--------|-----------|---------|
|                    | 0.284  | 3.00      | 9.98    |
|                    | 0.297  | 2.85      | 9.20    |
|                    | 0.299  | 3.20      | 10.10   |
|                    | 0.275  | 3.28      | 10.10   |
|                    | 0.277  | 3.17      | 10.40   |
|                    | 0.276  | 3.17      | 8.96    |
|                    | 0.274  | 3.29      | 9.88    |
|                    | 0.285  | 2.94      | 8.82    |
|                    | 0.321  | 3.23      | 9.67    |
|                    | 0.277  | 3.31      | 9.82    |
|                    | 0.318  | 3.33      | 10.60   |
|                    | 0.315  | 2.82      | 10.10   |
|                    | 0.293  | 2.74      | 10.80   |
|                    | 0.267  | 2.87      | 9.52    |
|                    | 0.324  | 3.13      | 10.70   |
|                    | 0.323  | 3.20      | 10.30   |
|                    | 0.321  | 3.21      | 11.30   |
|                    | 0.284  | 3.00      | 9.98    |
| Mean (ng/mL)       | 0.29   | 3.11      | 10.01   |
| SD                 | 0.02   | 0.19      | 0.64    |
| R.E. (%)           | -3.33  | 3.67      | 0.10    |
| intra-day C.V. (%) | 6.48   | 5.57      | 5.69    |
| inter-day C.V. (%) | 9.14   | 8.56      | 10.19   |

Table S2. Recoveries of azoxystrobin at different concentrations. (n=4)

| Recoveries (%) | Low QC | Medium QC | High QC |
|----------------|--------|-----------|---------|
|                | 101.53 | 107.46    | 100.31  |
|                | 109.26 | 107.14    | 81.36   |
|                | 101.97 | 93.12     | 96.99   |
|                | 113.81 | 108.90    | 101.07  |
| Mean           | 106.64 | 104.15    | 94.93   |
| SD             | 5.95   | 7.40      | 9.22    |

Table S3. Matrix effects of azoxystrobin at different concentrations. (n=4)

| Matrix effects (%) | Low QC | Medium QC | High QC |
|--------------------|--------|-----------|---------|
|                    | 111.70 | 103.31    | 106.56  |
|                    | 93.73  | 88.39     | 105.55  |
|                    | 104.60 | 106.66    | 102.27  |
|                    | 88.47  | 94.25     | 91.01   |
| Mean               | 103.34 | 99.45     | 104.79  |
| SD                 | 10.48  | 8.36      | 7.13    |

Table S4. Stability of azoxystrobin under different conditions. (Mean  $\pm$  SD, n = 3)

| Nominal Conc.(ng/mL) | Long Term        | Short Term       | Freeze-Thaw      | Autosampler      |
|----------------------|------------------|------------------|------------------|------------------|
| 0.3                  | 0.31 $\pm$ 0.01  | 0.31 $\pm$ 0.02  | 0.32 $\pm$ 0.01  | 0.31 $\pm$ 0.02  |
| 3                    | 2.74 $\pm$ 0.09  | 2.99 $\pm$ 0.13  | 2.78 $\pm$ 0.23  | 3.05 $\pm$ 0.21  |
| 10                   | 10.23 $\pm$ 0.15 | 10.40 $\pm$ 0.36 | 10.55 $\pm$ 0.62 | 10.18 $\pm$ 0.53 |
